# Supplementary material
Source: PubMed Central journal article supplement (PMC7065722)
Supplement: bi9b00923_si_001.pdf [file bi9b00923_si_001.pdf]

## Supporting Information

### **Structural and biochemical investigations of the [4Fe-4S] cluster-containing fumarate hydratase from *Leishmania major***

Patricia R. Feliciano<sup>1,2,3,\*</sup> and Catherine L. Drennan<sup>1,2,3,\*</sup>

<sup>1</sup>Howard Hughes Medical Institute, Massachusetts Institute of Technology, Cambridge, MA 02139.

<sup>2</sup>Department of Biology, Massachusetts Institute of Technology, Cambridge, MA 02139.

<sup>3</sup>Department of Chemistry, Massachusetts Institute of Technology, Cambridge, MA 02139.

Corresponding Authors

\*E-mail: [pattyrf@mit.edu](mailto:pattyrf@mit.edu)

\*E-mail: [cdrennan@mit.edu](mailto:cdrennan@mit.edu)

**Table S1.** Primers used for site-directed mutagenesis of LmFH-2

| Name         | Forward primer                                   | Reverse primer                                   |
|--------------|--------------------------------------------------|--------------------------------------------------|
| LmFH-2-D135A | 5' CCG TCG TGC CAG <u>GCT</u> ACC GGC ACG GCC 3' | 5' GGC CGT GCC GGT <u>AGC</u> CTG GCA CGA CGG 3' |
| LmFH-2-R173A | 5' TAC CAC AAC CTG <u>GCT</u> TAC AGC CAG ACG 3' | 5' CGT CTG GCT GTA <u>AGC</u> CAG GTT GTG GTA 3' |
| LmFH-2-H334A | 5' CGG TTG CCC CGC <u>GCC</u> GGT GCC TCC TGC 3' | 5' GCA GGA GGC ACC <u>GGC</u> GCG GGG CAA CCG 3' |
| LmFH-2-R421A | 5' CTC ATC GTT GCC <u>GCT</u> GAT ATT GCC CAC 3' | 5' GTG GGC AAT ATC <u>AGC</u> GGC AAC GAT GAG 3' |
| LmFH-2-T467A | 5' CC TTT GGC CCG <u>GCG</u> ACG GCC GGC CG 3'   | 5' CG GCC GGC CGT <u>CGC</u> CGG GCC AAA GG 3'   |
| LmFH-2-R471A | 5' ACG ACG GCC GGC <u>GCC</u> ATG GAC TCC TAC 3' | 5' GTA GGA GTC CAT <u>GGC</u> GCC GGC CGT CGT 3' |

Oligonucleotide sequences were based on the *Leishmania major* genome sequence (GeneDB accession code LmjF.29.1960). Underlined letters represent the nucleotides changed for the desired mutation.

**Table S2.** Tacsimate composition and its variations<sup>a-c</sup> to obtain structures with particular ligands bound

| Co-crystallized ligand    | 100%<br>Tacsimate<br>pH 5 | 100%<br>Tacsimate <sup>a</sup><br>pH 5 with<br><i>S</i> -malate | 100%<br>Tacsimate <sup>b</sup><br>pH 5 with<br>fumarate | 100%<br>Tacsimate <sup>c</sup><br>pH 5 with<br>malonate | 100%<br>Tacsimate <sup>d</sup><br>pH 5 with<br>succinate | 100%<br>Tacsimate <sup>e</sup><br>pH 5<br>without<br>ligands |
|---------------------------|---------------------------|-----------------------------------------------------------------|---------------------------------------------------------|---------------------------------------------------------|----------------------------------------------------------|--------------------------------------------------------------|
| Ammonium citrate tribasic | 0.25 M                    | 0.25 M                                                          | 0.25 M                                                  | 0.25 M                                                  | 0.25 M                                                   | 0.25 M                                                       |
| Sodium acetate trihydrate | 0.40 M                    | 0.40 M                                                          | 0.40 M                                                  | 0.40 M                                                  | 0.40 M                                                   | 0.40 M                                                       |
| Sodium formate            | 0.50 M                    | 0.50 M                                                          | 0.50 M                                                  | 0.50 M                                                  | 0.50 M                                                   | 0.50 M                                                       |
| Ammonium tartrate dibasic | 0.16 M                    | 0.16 M                                                          | 0.16 M                                                  | 0.16 M                                                  | 0.16 M                                                   | 0.16 M                                                       |
| <i>RS</i> -Malic acid     | 0.30 M                    | -                                                               | -                                                       | -                                                       | -                                                        | -                                                            |
| Malonic acid              | 1.83 M                    | -                                                               | -                                                       | 1.83 M                                                  | -                                                        | -                                                            |
| Succinic acid             | 0.12 M                    | -                                                               | -                                                       | -                                                       | 0.12 M                                                   | -                                                            |
| <i>S</i> -malate          | -                         | 0.30 M                                                          | -                                                       | -                                                       | -                                                        | -                                                            |
| Fumarate                  | -                         | -                                                               | 0.30 M                                                  | -                                                       | -                                                        | -                                                            |

**Table S3.** Data collection and refinement statistics of LmFH-2

| Data name                                         | LmFH-2-holo<br>(PDB ID 6UNZ) | LmFH-2-mal<br>(PDB ID 6UO0) | LmFH-2-malo<br>(PDB ID 6UO1) | LmFH-2-suc<br>(PDB ID 6UOJ) |
|---------------------------------------------------|------------------------------|-----------------------------|------------------------------|-----------------------------|
| Co-crystallization                                | -                            | <i>S</i> -malate            | Malonate                     | Succinate                   |
| Ligand in the structure                           | -                            | <i>S</i> -malate            | Malonate                     | Succinate                   |
| <b>Data collection</b>                            |                              |                             |                              |                             |
| Space group                                       | $P2_1$                       | $P2_12_12_1$                | $P2_12_12_1$                 | $P2_12_12_1$                |
| Cell dimensions                                   |                              |                             |                              |                             |
| <i>a</i> , <i>b</i> , <i>c</i> (Å)                | 159.09, 66.07, 238.08        | 65.61, 84.68, 239.66        | 65.58, 85.10, 240.23         | 65.61, 84.84, 240.54        |
| $\alpha$ , $\beta$ , $\gamma$ (°)                 | 90, 90.02, 90                | 90, 90.90                   | 90, 90.90                    | 90, 90.90                   |
| Wavelength (Å)                                    | 0.9795                       | 0.9795                      | 0.9795                       | 0.9795                      |
| Resolution (Å)                                    | 50-3.2 (3.26-3.2)*           | 50-1.85 (1.88-1.85)*        | 50-1.95 (1.98-1.95)*         | 50-2.35 (2.39-2.35)*        |
| No. of unique reflections                         | 75,134                       | 110,293                     | 98,420                       | 56,220                      |
| $R_{\text{sym}}$                                  | 0.219 (0.855)*               | 0.139 (0.906)*              | 0.136 (0.747)*               | 0.137 (0.531)*              |
| $I/\sigma(I)$                                     | 5.0 (1.0)*                   | 7.5 (1.9)*                  | 12.2 (1.6)*                  | 6.75 (1.34)                 |
| CC1/2 <sup>§</sup>                                | (0.334)*                     | (0.597)*                    | (0.699)*                     | (0.721)*                    |
| Completeness (%)                                  | 90.4 (78.1)*                 | 96.0 (86.1)*                | 99.8 (99.0)*                 | 98.7 (98.4)*                |
| Redundancy                                        | 3.0 (2.6)*                   | 5.3 (4.4)*                  | 6.0 (3.8)*                   | 3.6 (3.0)*                  |
| <b>Refinement</b>                                 |                              |                             |                              |                             |
| No. of reflections used                           | 75,122 (6,448)*              | 109,580 (9,785)*            | 98,288 (9,640)*              | 56,154 (5,496)*             |
| $R_{\text{work}} / R_{\text{free}}$ <sup>**</sup> | 0.2453/0.2888                | 0.1560/0.1888               | 0.1471/0.1760                | 0.1480/0.2019               |
| No. of atoms                                      |                              |                             |                              |                             |
| Protein                                           | 31,167                       | 8,435                       | 8,555                        | 8,299                       |
| No. of molecules                                  |                              |                             |                              |                             |
| [4Fe-4S] cluster                                  | 8                            | 2                           | -                            | 2                           |
| [3Fe-4S] cluster                                  | -                            | -                           | 2                            | -                           |
| Fe                                                | -                            | -                           | 2                            | -                           |
| <i>S</i> -malate                                  | -                            | 4                           | -                            | -                           |
| Malonate                                          | -                            | -                           | 6                            | -                           |
| Succinate                                         | -                            | -                           | -                            | 2                           |
| Glycerol                                          | 2                            | 4                           | 1                            | 2                           |
| Water                                             | 3                            | 902                         | 882                          | 603                         |
| Average B-factors (Å <sup>2</sup> )               |                              |                             |                              |                             |
| Protein                                           | 63                           | 27                          | 27                           | 32                          |
| [4Fe-4S] cluster                                  | 72                           | 20                          | -                            | 30                          |
| [3Fe-4S] cluster                                  | -                            | -                           | 20                           | -                           |
| Fe                                                | -                            | -                           | 27                           | -                           |
| <i>S</i> -malate                                  | -                            | 28                          | -                            | -                           |
| Malonate                                          | -                            | -                           | 28                           | -                           |
| Succinate                                         | -                            | -                           | -                            | 30                          |
| Glycerol                                          | 50                           | 48                          | 36                           | 66                          |
| Water                                             | 42                           | 38                          | 38                           | 38                          |
| R.m.s deviations                                  |                              |                             |                              |                             |
| Bond lengths (Å)                                  | 0.007                        | 0.006                       | 0.005                        | 0.006                       |
| Bond angles (°)                                   | 1.40                         | 1.10                        | 1.09                         | 1.10                        |
| Ramachandran analysis <sup>#</sup> (%)            |                              |                             |                              |                             |
| Favored                                           | 96.6                         | 97.7                        | 97.4                         | 97.4                        |
| Allowed                                           | 3.1                          | 2.3                         | 2.6                          | 2.6                         |
| Outliers                                          | 0.3                          | 0                           | 0                            | 0                           |

\*Highest resolution shell is shown in parenthesis.

\*\* $R_{\text{free}}$  was calculated with 5% of the data.<sup>§</sup>The overall CC1/2 was not available from the version of HKL2000 that was used.<sup>#</sup>Distribution of dihedral angles in the Ramachandran diagram was calculated with the *MolProbity* program<sup>1</sup>.

**Table S4.** Data collection and refinement statistics of LmFH-2 variants

| Data name                                                         | LmFH-2-T467A-tacs<br>(PDB ID 6UP9)                           | LmFH-2-T467A-mal<br>(PDB ID 6UPM)                            | LmFH-2-H334A-mal<br>(PDB ID 6UPO)                            | LmFH-2-R421A-tacs<br>(PDB ID 6UQ8)                           | LmFH-2-R421A-mal<br>(PDB ID 6UQ9)                            | LmFH-2-R471A-tacs<br>(PDB ID 6UQB)                           | LmFH-2-R471A-mal<br>(PDB ID 6UQL)                            | LmFH-2-R173A-mal<br>(PDB ID 6UQM)                            | LmFH-2-R173A-fum<br>(PDB ID 6UQN)                            |
|-------------------------------------------------------------------|--------------------------------------------------------------|--------------------------------------------------------------|--------------------------------------------------------------|--------------------------------------------------------------|--------------------------------------------------------------|--------------------------------------------------------------|--------------------------------------------------------------|--------------------------------------------------------------|--------------------------------------------------------------|
| Co-crystallization                                                | <i>RS</i> -Malate, malonate,<br>and succinate                | <i>S</i> -Malate                                             | <i>S</i> -Malate                                             | <i>RS</i> -Malate, malonate,<br>and succinate                | <i>S</i> -Malate                                             | <i>RS</i> -Malate, malonate,<br>and succinate                | <i>S</i> -Malate                                             | <i>S</i> -Malate                                             | Fumarate                                                     |
| Ligands in the structure                                          | Malonate                                                     | <i>S</i> -Malate                                             | <i>S</i> -Malate                                             | <i>S</i> -Malate and malonate                                | <i>S</i> -Malate                                             | <i>S</i> -Malate and malonate                                | <i>S</i> -Malate                                             | <i>S</i> -Malate                                             | Fumarate and <i>S</i> -malate                                |
| <b>Data collection</b>                                            |                                                              |                                                              |                                                              |                                                              |                                                              |                                                              |                                                              |                                                              |                                                              |
| Space group                                                       | <i>P</i> <sub>2</sub> <sub>1</sub> <sub>2</sub> <sub>1</sub> |
| Cell dimensions                                                   |                                                              |                                                              |                                                              |                                                              |                                                              |                                                              |                                                              |                                                              |                                                              |
| <i>a</i> , <i>b</i> , <i>c</i> (Å)                                | 65.65, 84.94, 240.21                                         | 65.62, 84.72, 239.67                                         | 65.93, 84.59, 240.36                                         | 65.73, 84.75, 240.12                                         | 65.76, 84.80, 240.22                                         | 65.46, 84.94, 240.27                                         | 65.71, 84.80, 240.22                                         | 65.62, 85.07, 240.42                                         | 65.15, 85.41, 240.72                                         |
| $\alpha$ , $\beta$ , $\gamma$ (°)                                 | 90, 90, 90                                                   | 90, 90, 90                                                   | 90, 90, 90                                                   | 90, 90, 90                                                   | 90, 90, 90                                                   | 90, 90, 90                                                   | 90, 90, 90                                                   | 90, 90, 90                                                   | 90, 90, 90                                                   |
| Wavelength (Å)                                                    | 0.9795                                                       | 0.9795                                                       | 0.9792                                                       | 0.9791                                                       | 0.9791                                                       | 0.9791                                                       | 0.9791                                                       | 0.9792                                                       | 0.9792                                                       |
| Resolution (Å)                                                    | 50-1.95 (1.98-1.95)*                                         | 50-2.03 (2.07-2.03)*                                         | 50-3.11 (3.16-3.11)*                                         | 50-1.34 (1.36-1.34)*                                         | 50-2.30 (2.34-2.30)*                                         | 50-1.95 (1.98-1.95)*                                         | 50-2.1 (2.14-2.1)*                                           | 50-2.0 (2.03-2.0)*                                           | 50-3.3 (3.36-3.3)*                                           |
| No. of unique reflections                                         | 97,272                                                       | 87,005                                                       | 22,910                                                       | 283,622                                                      | 59,015                                                       | 98,175                                                       | 78,203                                                       | 90,969                                                       | 20,385                                                       |
| <i>R</i> <sub>sym</sub>                                           | 0.107 (0.987)*                                               | 0.228 (0.984)*                                               | 0.262 (1.109)*                                               | 0.077 (1.202)*                                               | 0.348 (0.923)*                                               | 0.119 (0.849)*                                               | 0.162 (0.860)*                                               | 0.166 (0.723)*                                               | 0.302 (1.130)*                                               |
| <i>I</i> / $\sigma$ ( <i>I</i> )                                  | 9.3 (1.1)*                                                   | 7.7 (1.2)*                                                   | 6.2 (1.0)*                                                   | 22.2 (1.0)*                                                  | 7.9 (1.9)*                                                   | 16.0 (2.2)*                                                  | 9.0 (1.6)*                                                   | 7.2 (1.2)*                                                   | 4.5 (1.0)*                                                   |
| CC1/2 <sup>s</sup>                                                | (0.453)*                                                     | (0.445)*                                                     | (0.323)*                                                     | (0.605)*                                                     | (0.776)*                                                     | (0.815)*                                                     | (0.742)*                                                     | (0.649)*                                                     | (0.335)*                                                     |
| Completeness (%)                                                  | 98.5 (98.3)*                                                 | 99.6 (97.7)*                                                 | 92.0 (81.5)*                                                 | 94.3 (88.4)*                                                 | 97.8 (93.5)*                                                 | 99.9 (99.9)*                                                 | 98.6 (97.7)*                                                 | 99.5 (98.1)*                                                 | 96.7 (99.0)*                                                 |
| Redundancy                                                        | 3.5 (3.1)*                                                   | 5.5 (3.0)*                                                   | 5.5 (3.4)*                                                   | 9.5 (6.9)*                                                   | 10.4 (7.3)*                                                  | 9.1 (8.1)*                                                   | 6.5 (5.9)*                                                   | 5.9 (3.5)*                                                   | 3.6 (3.2)*                                                   |
| <b>Refinement</b>                                                 |                                                              |                                                              |                                                              |                                                              |                                                              |                                                              |                                                              |                                                              |                                                              |
| No. of reflections used                                           | 97,209 (9,291)*                                              | 86,927 (8,449)*                                              | 22,858 (1,950)*                                              | 283,518 (25,497)*                                            | 58,941 (5,420)*                                              | 98,085 (9,515)*                                              | 78,118 (7,603)*                                              | 90,865 (8,826)*                                              | 20,341 (2,018)*                                              |
| <i>R</i> <sub>work</sub> / <i>R</i> <sub>free</sub> <sup>**</sup> | 0.1574/0.1936                                                | 0.1563/0.1930                                                | 0.2001/0.2541                                                | 0.1341/0.1435                                                | 0.1420/0.1892                                                | 0.1434/0.1742                                                | 0.1462/0.1834                                                | 0.1475/0.1879                                                | 0.2054/0.2630                                                |
| No. of atoms                                                      |                                                              |                                                              |                                                              |                                                              |                                                              |                                                              |                                                              |                                                              |                                                              |
| Protein                                                           | 8,249                                                        | 8,373                                                        | 8,059                                                        | 8,727                                                        | 8,249                                                        | 8,341                                                        | 8,274                                                        | 8,463                                                        | 8,101                                                        |
| No. of molecules                                                  |                                                              |                                                              |                                                              |                                                              |                                                              |                                                              |                                                              |                                                              |                                                              |
| [4Fe-4S] cluster                                                  | 2                                                            | 2                                                            | 2                                                            | 2                                                            | 2                                                            | 2                                                            | 2                                                            | 2                                                            | 2                                                            |
| <i>S</i> -malate                                                  | -                                                            | 2                                                            | 2                                                            | 2                                                            | 2                                                            | 2                                                            | 2                                                            | 2                                                            | 1                                                            |
| Fumarate                                                          | -                                                            | -                                                            | -                                                            | -                                                            | -                                                            | -                                                            | -                                                            | -                                                            | 1                                                            |
| Malonate                                                          | 6                                                            | -                                                            | -                                                            | 4                                                            | -                                                            | 4                                                            | -                                                            | -                                                            | -                                                            |
| Glycerol                                                          | 1                                                            | 2                                                            | -                                                            | 5                                                            | 1                                                            | 2                                                            | 2                                                            | 6                                                            | 1                                                            |
| Water                                                             | 783                                                          | 867                                                          | 12                                                           | 871                                                          | 643                                                          | 919                                                          | 733                                                          | 833                                                          | 17                                                           |
| Average B-factors (Å <sup>2</sup> )                               |                                                              |                                                              |                                                              |                                                              |                                                              |                                                              |                                                              |                                                              |                                                              |
| Protein                                                           | 27                                                           | 24                                                           | 48                                                           | 18                                                           | 25                                                           | 28                                                           | 27                                                           | 25                                                           | 56                                                           |
| [4Fe-4S] cluster                                                  | 20                                                           | 17                                                           | 45                                                           | 12                                                           | 17                                                           | 20                                                           | 19                                                           | 17                                                           | 52                                                           |
| <i>S</i> -malate                                                  | -                                                            | 20                                                           | 46                                                           | 13                                                           | 18                                                           | 21                                                           | 21                                                           | 19                                                           | 57                                                           |
| Fumarate                                                          | -                                                            | -                                                            | -                                                            | -                                                            | -                                                            | -                                                            | -                                                            | -                                                            | 60                                                           |
| Malonate                                                          | 30                                                           | -                                                            | -                                                            | 21                                                           | -                                                            | 30                                                           | -                                                            | -                                                            | -                                                            |
| Glycerol                                                          | 37                                                           | 46                                                           | -                                                            | 30                                                           | 41                                                           | 42                                                           | 46                                                           | 47                                                           | 59                                                           |
| Water                                                             | 37                                                           | 35                                                           | 39                                                           | 27                                                           | 32                                                           | 38                                                           | 36                                                           | 35                                                           | 27                                                           |
| R.m.s deviations                                                  |                                                              |                                                              |                                                              |                                                              |                                                              |                                                              |                                                              |                                                              |                                                              |
| Bond lengths (Å)                                                  | 0.006                                                        | 0.005                                                        | 0.004                                                        | 0.008                                                        | 0.005                                                        | 0.005                                                        | 0.006                                                        | 0.008                                                        | 0.004                                                        |
| Bond angles (°)                                                   | 1.11                                                         | 1.09                                                         | 0.97                                                         | 1.32                                                         | 1.09                                                         | 1.09                                                         | 1.10                                                         | 1.18                                                         | 0.97                                                         |
| Ramachandran analysis <sup>#</sup> (%)                            |                                                              |                                                              |                                                              |                                                              |                                                              |                                                              |                                                              |                                                              |                                                              |
| Favored                                                           | 97.4                                                         | 97.5                                                         | 95.6                                                         | 97.6                                                         | 97.2                                                         | 97.5                                                         | 97.4                                                         | 97.6                                                         | 96.0                                                         |
| Allowed                                                           | 2.6                                                          | 2.5                                                          | 4.4                                                          | 2.2                                                          | 2.8                                                          | 2.5                                                          | 2.6                                                          | 2.4                                                          | 4.0                                                          |
| Outliers                                                          | 0                                                            | 0                                                            | 0                                                            | 0.2                                                          | 0                                                            | 0                                                            | 0                                                            | 0                                                            | 0                                                            |

\*Highest resolution shell is shown in parenthesis.

\*\**R*<sub>free</sub> was calculated with 5% of the data.<sup>s</sup>The overall CC1/2 was not available from the version of HKL2000 that was used.<sup>#</sup>Distribution of dihedral angles in the Ramachandran diagram was calculated with the *MolProbity* program<sup>l</sup>.

**Table S5.** The number of residues visualized in each LmFH-2 structure

| Enzyme            | Chain A          | Chain B          | Chain C          | Chain D          | Chain E          | Chain F          | Chain G          | Chain H          |
|-------------------|------------------|------------------|------------------|------------------|------------------|------------------|------------------|------------------|
| LmFH-2-holo       | 21-375 / 385-568 | 27-377 / 386-568 | 28-375 / 385-568 | 28-375 / 388-568 | 29-375 / 385-568 | 28-375 / 386-568 | 28-375 / 385-568 | 28-375 / 386-568 |
| LmFH-2-mal        | 28-375 / 385-568 | 28-375 / 385-568 | -                | -                | -                | -                | -                | -                |
| LmFH-2-malo       | 26-376 / 385-568 | 28-375 / 385-568 | -                | -                | -                | -                | -                | -                |
| LmFH-2-suc        | 26-376 / 385-568 | 28-375 / 385-568 | -                | -                | -                | -                | -                | -                |
| LmFH-2-T467A-tacs | 28-375 / 385-568 | 28-375 / 385-568 | -                | -                | -                | -                | -                | -                |
| LmFH-2-T467A-mal  | 28-375 / 385-568 | 28-375 / 385-568 | -                | -                | -                | -                | -                | -                |
| LmFH-2-H334A-mal  | 28-376 / 385-568 | 28-376 / 385-568 | -                | -                | -                | -                | -                | -                |
| LmFH-2-R421A-tacs | 28-375 / 385-568 | 28-374 / 386-568 | -                | -                | -                | -                | -                | -                |
| LmFH-2-R421A-mal  | 28-376 / 385-568 | 28-375 / 386-568 | -                | -                | -                | -                | -                | -                |
| LmFH-2-R471A-tacs | 28-377 / 384-568 | 28-375 / 385-568 | -                | -                | -                | -                | -                | -                |
| LmFH-2-R471A-mal  | 28-375 / 385-568 | 28-377 / 385-568 | -                | -                | -                | -                | -                | -                |
| LmFH-2-R173A-mal  | 28-377 / 385-568 | 28-375 / 386-568 | -                | -                | -                | -                | -                | -                |
| LmFH-2-R173A-fum  | 26-375 / 385-568 | 28-375 / 385-568 | -                | -                | -                | -                | -                | -                |

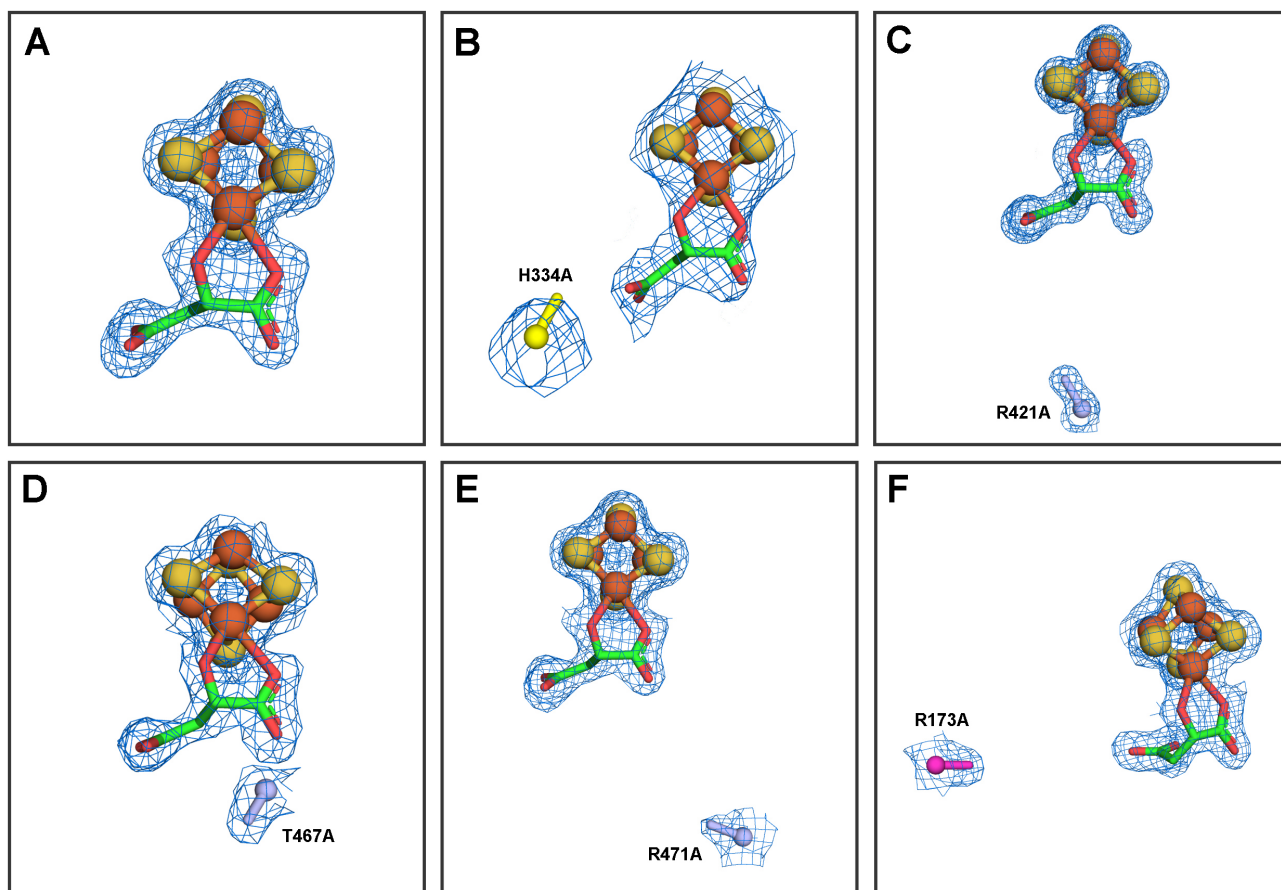

**Figure S1.** Electron density maps of LmFH-2 and variants with *S*-malate. **(A)** Crystal structure of LmFH-2 in a complex with *S*-malate at 1.85 Å resolution. **(B)** Crystal structure of LmFH-2-H334A in a complex with *S*-malate at 3.11 Å resolution. **(C)** Crystal structure of LmFH-2-R421A in a complex with *S*-malate at 1.34 Å resolution. **(D)** Crystal structure of LmFH-2-T467A in a complex with *S*-malate at 2.03 Å resolution. **(E)** Crystal structure of LmFH-2-R471A in a complex with *S*-malate at 1.95 Å resolution. **(F)** Crystal structure of LmFH-2-R173A in a complex with *S*-malate at 2.0 Å resolution.  $2F_o - F_c$  electron density maps contoured at 1.5 RMSD are shown in blue mesh for *S*-malate (green), [4Fe-4S] cluster (orange (Fe) and yellow (S) spheres), and the substitutions H334A (yellow), R421A (light blue), T467A (light blue), R471A (light blue), and R173A (magenta).

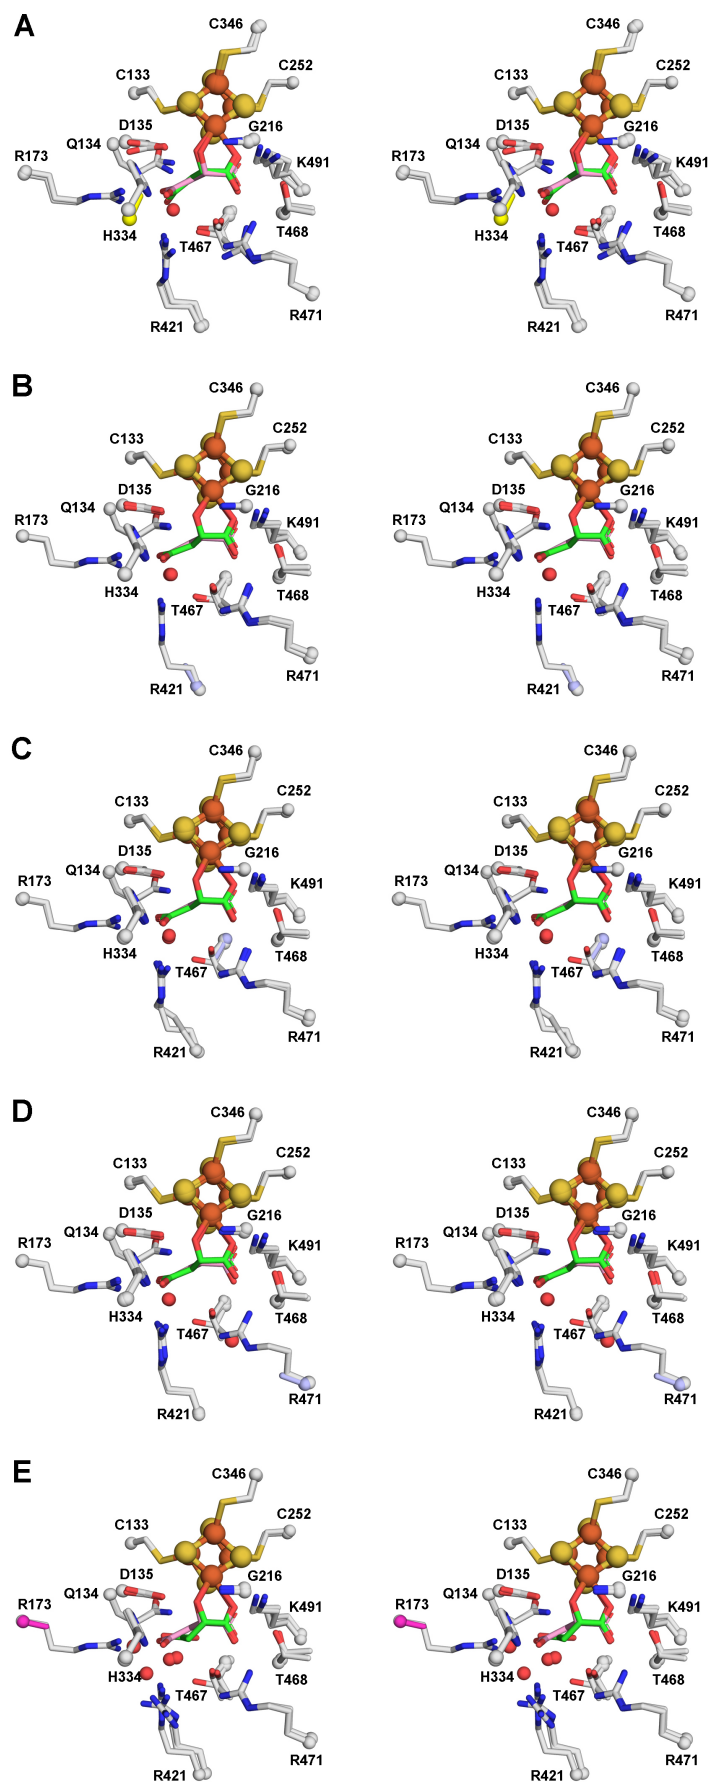

**Figure S2.** Stereoviews of LmFH-2 and variants in a complex with *S*-malate. **(A)** Superposition of LmFH-2 and LmFH-2-H334A in a complex with *S*-malate. **(B)** Superposition of LmFH-2 and LmFH-2-R421A in a complex with *S*-malate. **(C)** Superposition of LmFH-2 and LmFH-2-T467A in a complex with *S*-malate. **(D)** Superposition of LmFH-2 and LmFH-2-R471A in a complex with *S*-malate. **(E)** Superposition of LmFH-2 and LmFH-2-R173A in a complex with *S*-malate. The substrate *S*-malate is shown in pink for wild type and green for variants. The [4Fe-4S] cluster is shown in orange (Fe) and yellow (S) spheres. The water molecules are shown in red spheres. The substituted residue H334A is shown in yellow. The substitutions R421A, T467A, and R471A are shown in light blue. The substituted residue R173A is shown in magenta.



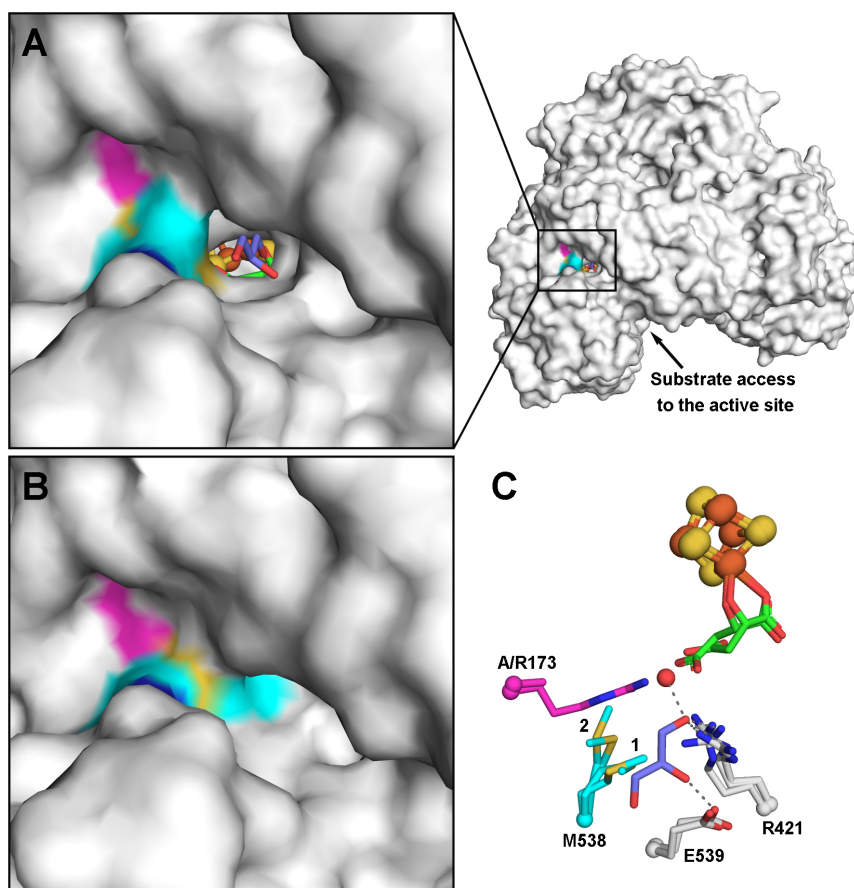

**Figure S3.** An LmFH-2-R173A structure reveals a solvent-exposed pocket that is not observed in wild type LmFH-2. **(A)** The right panel shows the surface of the *S*-malate-bound LmFH-2-R173A structure indicating the location of the solvent-exposed pocket (black rectangle). This pocket is created by movement of M538 residue (position 2 in panel C) due to the substitution of R173 to alanine. The left panel shows a closer view of this pocket with access to the active site, where a molecule of glycerol (slate blue) was found. **(B)** The surface of the *S*-malate-bound LmFH-2 structure showing the absence of the pocket when the M538 residue is in its typical location (position 1 in panel C). **(C)** Superposition of *S*-malate-bound LmFH-2 and LmFH-2-R173A structures. The hydrogen bonds between glycerol (slate blue) and the residues (white) in the solvent-exposed pocket are shown as gray dashed lines. The double conformation of M538 residue from LmFH-2 (position 1) and LmFH-2-R173A (position 2) are shown in cyan. The R173 residue and the R173A substitution are shown in magenta. The *S*-malate is shown in green. The [4Fe-4S] cluster is shown in orange (Fe) and yellow (S) spheres.

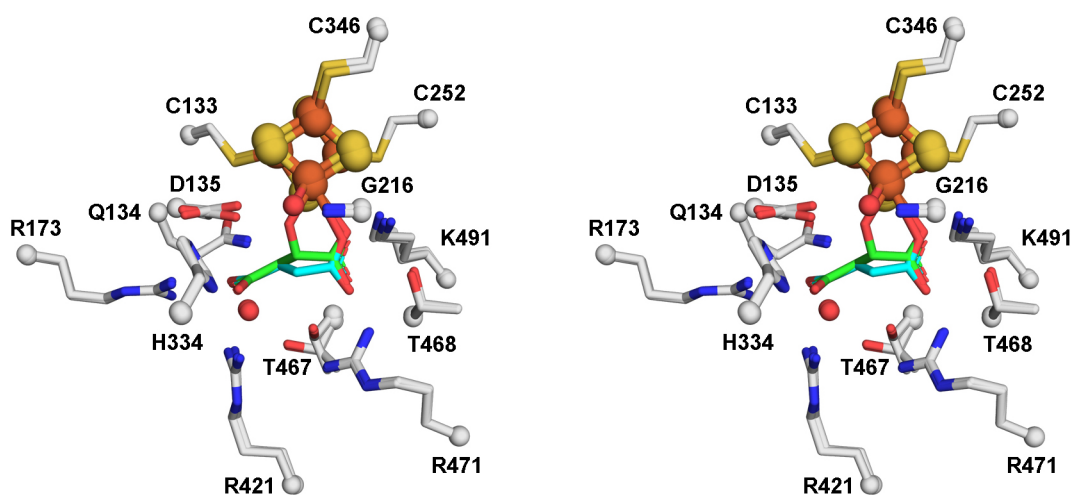

**Figure S4.** Stereoview of the superposition of LmFH-2 active sites in a complex with *S*-malate and succinate. The substrate *S*-malate is shown in green. Succinate is shown in cyan. The [4Fe-4S] cluster is shown in orange (Fe) and yellow (S) spheres. The water molecules are shown in red spheres.

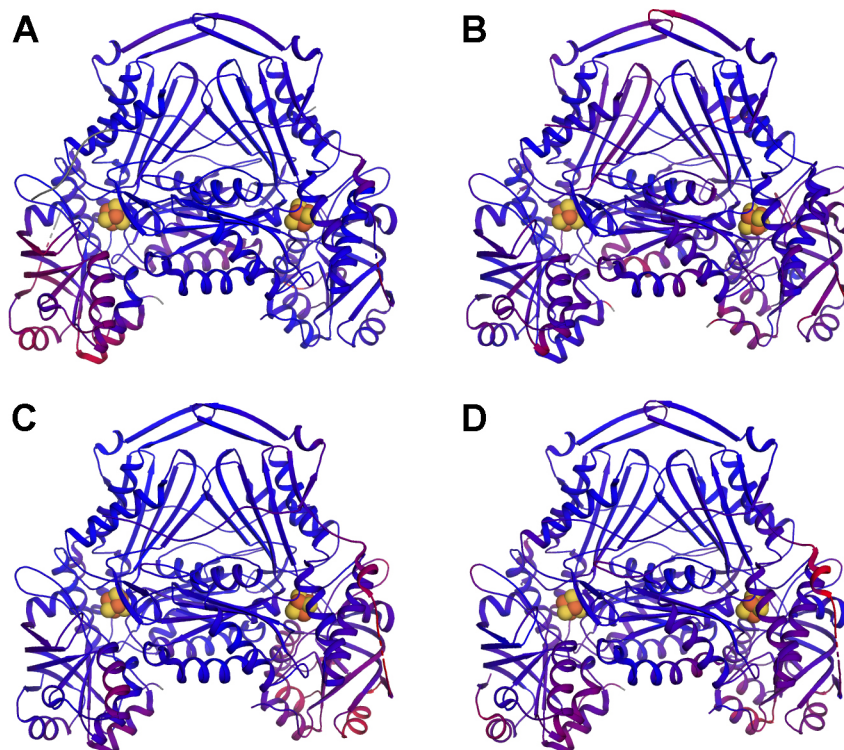

**Figure S5.** LmFH-2-holo dimers colored by RMSD. **(A)** LmFH-2-holo chains A and B. **(B)** LmFH-2-holo chains C and D. **(C)** LmFH-2-holo chains E and F. **(D)** LmFH-2-holo chains G and H. Each dimer of LmFH-2-holo structure was aligned with LmFH-2 structure in a complex with *S*-malate and spectrum colored by per-residue  $C\alpha$  RMSD values using the ColorByRMSD PyMol script. Blue was used for minimum pairwise RMSD and red for maximum pairwise RMSD. The [4Fe-4S] cluster is shown in orange (Fe) and yellow (S) spheres.

## Reference

- (1) Chen, V. B., Arendall, W. B., III, Headd, J. J., Keedy, D. A., Immormino, R. M., Kapral, G. J., Murray, L. W., Richardson, J. S., and Richardson, D. C. (2010) MolProbity: all-atom structure validation for macromolecular crystallography, *Acta Crystallographica Section D-Biological Crystallography* 66, 12–21.
